# Supplementary material for: Novel chromium(vi) catalyzed oxidation of N-alkylamides to imides with periodic acid
Source: Royal Society of Chemistry journal article supplement (doi:10.1039/b404823g), 2004-01-01
Supplement: b404823g.doc [file b404823g.doc]

Supplementary Information

Novel Chromium(VI) Catalyzed Oxidation of *N*-Alkylamides to Imides with Periodic Acid

Liang Xua and Mark L. Trudellb

*a St Charles Pharmaceuticals, Inc., P.O. Box 850815, New Orleans, Louisiana 70185*

*b Department of Chemistry, University of New Orleans, New Orleans, Louisiana 70148*

All known products were identified by comparison of NMR spectral and physical data with the data reported in the literature and with the authentic samples when available. All new compounds were characterized by IR, 1H NMR, 13C NMR and elemental analysis. 1H and 13C NMR spectra were recorded on a Varien-400 MHz spectrometer at ambient temperature in DMS-d6 (Cambridge Isotope Laboratories, Inc.). C, H, N analysis were determined by Atlantic Microlabs, Inc., Norcross, GA. Melting points were recorded on a hoover Mel-Temp apparatus and are uncorrected.

***N*-Undecyl benzimide**:

Mp. 65-7 oC. IR (liquid film) 3303, 2919, 2849, 1706, 1678, 1468, 1249, 1183 cm-1. 1H NMR (400 MHz, DMSO-d6)  10.91 (s, 1H), 7.90 (d, *J*=8.0, 2H), 7.48-7.61 (m, 3H), 2.68 (t, *J*=7.2, 2H), 1.53-1.58 (m, 2H), 1.23-1.30 (m, 14H), 0.85 (t, *J*=7.2, 3H). 13C NMR (75 MHz, DMSO-d6)  174.6, 166.3, 133.3, 132.5, 128.38, 128.30, 36.9, 31.2, 28.95, 28.92, 28.80, 28.68, 28.55, 23.9, 22.0, 13.8. Anal. Calcd for C18H27NO2: C, 74.74; H, 9.34; N, 4.84. Found: C, 74.68; H, 9.42; N, 4.83.

***N*-Cyclopropylcarbonyl benzimide**:

Mp.136-8 oC. IR (liquid film) 3276, 2914, 1733, 1682, 1485, 1394, 1264, 1160 cm-1. 1H NMR (400 MHz, DMSO-d6)  11.1 (s, 1H), 7.91 (d, *J*=8.4, 2H), 7.50-7.64 (m, 3H), 2.45-2.51 (m, 1H), 0.92 (d, *J*=6.0, 4H). 13C NMR (75 MHz, DMSO-d6)  174, 166, 133, 132, 128.36, 128.27, 14.4, 9.2. Anal. Calcd for C11H11NO2: C, 69.84; H, 5.82; N, 7.40. Found: C, 69.71; H, 5.87; N, 7.35.

### *N*-Propiolyl Benzimide

Mp. 138-140 oC. IR (liquid film) 3239, 2113, 1714, 1650, 1458, 1247 cm-1. 1H NMR (400 MHz, DMSO-d6)  11.82 (s, 1H), 7.93 (d, *J*=8.4, 2H), 7.51-7.65 (m, 3H), 4.74 (s, 1H). 13C NMR (75 MHz, DMSO-d6)  165.8, 152.0, 133.1, 132.2, 128.5, 128.4, 82.6, 77.3. Anal. Calcd for C10H7NO2: C, 69.36; H, 4.05; N, 8.09. Found: C, 68.98; H, 4.12; N, 7.90.

***N*-Acryloyl-4-chlorobenzimide**

Mp. 130-2 oC. IR (liquid film) 3244, 1724, 1682, 1595, 1408, 1252, 1087 cm-1. 1H NMR (400 MHz, DMSO-d6)  11.20 (s, 1H), 7.91 (d, *J*=8.0, 2H), 7.61 (d, *J*=8.4, 2H), 6.81-6.88 (m, 1H), 6.36 (d, *J*=16.8, 1H), 5.90 (d, *J*=10.4, 1H). 13C NMR (75 MHz, DMSO-d6)  165.8, 165.4, 137.6, 132.0, 130.8, 130.3, 130.0, 128.5. Anal. Calcd for C10H8ClNO2: C, 57.27; H, 3.82; N, 6.68. Found: C, 56.96; H, 3.93; N, 6.48.

***N*-Benzoyl-4-tertbutyl benzimide**

Mp. 184-6 oC. IR (liquid film) 3286, 2960, 1728, 1672, 1604, 1476, 1229 cm-1. 1H NMR (400 MHz, DMSO-d6)  11.2 (s, 1H), 7.90 (d, J=7.2, 2H), 7.86 (d, J=8.4, 2H), 7.52-7.64 (m, 5H), 1.31 (s, 9H). 13C NMR (75 MHz, DMSO-d6)  168.2, 167.9, 156.1, 134.3, 133.0, 131.5, 129.08, 129.02, 128.8, 125.6, 35.2, 31.3. Anal. Calcd for C18H19NO2: C, 76.86; H, 6.76; N, 4.98. Found: C, 76.98; H, 6.82; N, 5.00.

***N*-Benzoyl-4-cyanobenzimide**

Mp. 126-8 oC. IR (liquid film) 3281, 2226, 1728, 1678, 1481, 1225 cm-1. 1H NMR (400 MHz, DMSO-d6)  11.5 (s, 1H), 8.03 (d, *J*=7.2, 2H), 7.94 (d, *J*=8.4, 2H), 7.52-7.65 (m, 5H). 13C NMR (75 MHz, DMSO-d6)  167.3, 167.0, 138.0, 133.2, 132.7, 132.2, 129.1, 128.6, 128.3, 118.1, 114.3. Anal. Calcd for C15H10N2O2: C, 72.00; H, 4.00; N, 11.20. Found: C, 72.17; H, 3.95; N, 11.15.

***N*-Isobutyryl-4-nitrobenzimide**

Mp. 176-8 oC. IR (liquid film) 3271, 2974, 1742, 1691, 1527, 1353, 1266, 1147 cm-1. 1H NMR (400 MHz, DMSO-d6)  11.1 (s, 1H), 8.33 (d, *J*=8.8, 2H), 8.06 (d, *J*=8.8, 2H), 3.04 (m, 1H), 1.12 (d, J=6.8, 6H). 13C NMR (75 MHz, DMSO-d6)  177.6, 165.5, 149.4, 139.5, 129.7, 123.4, 34.6, 18.7. Anal. Calcd for C11H12N2O4: C, 55.93; H, 5.08; N, 11.86. Found: C, 55.86; H, 5.00; N, 11.72.

***N*-Propiolyl-4-tertbutylbenzimide**

Mp. 144-6 oC. IR (liquid film) 3244, 2965, 2113, 1719, 1669, 1490, 1262, 1201, 1110 cm-1. 1H NMR (400 MHz, DMSO-d6)  11.74 (s, 1H), 7.88 (d, *J*=8.8, 2H), 7.54 (d, *J*=8.4, 2H), 4.72 (s, 1H), 1.30 (s, 9H). 13C NMR (75 MHz, DMSO-d6)  165.6, 156.4, 152.1, 129.5, 128.6, 125.4, 82.8, 77.5, 34.9, 30.8. Anal. Calcd for C14H15NO2: C, 73.36; H, 6.55; N, 6.11. Found: C, 73.30; H, 6.65; N, 6.05.

***N*-Propiolyl-4-nitrobenzimide**

Mp. 152-4 oC. IR (liquid film) 3381, 2113, 1733, 1673, 1527, 1352, 1265 cm-1. 1H NMR (400 MHz, DMSO-d6)  12.1 (s, 1H), 8.34 (d, *J*=8.4, 2H), 8.13 (d, *J*=8.0, 2H), 4.79 (s, 1H). 13C NMR (75 MHz, DMSO-d6)  164.8, 151.6, 149.8, 138.0, 130.0, 123.4, 82.8, 77.2. Anal. Calcd for C10H6N2O4: C, 55.04; H, 2.75; N, 12.84. Found: C, 54.84; H, 2.82; N, 12.62.

***N*-Formyl-4-tertbutylbenzimide**

Mp. 134-6 oC. IR (liquid film) 3290, 2960, 1733, 1669, 1604, 1453, 1252 cm-1. 1H NMR (400 MHz, DMSO-d6)  11.68 (s, 1H), 9.26 (d, *J*=8.8, 1H), 7.97 (d, *J*=8.8, 2H), 7.56 (d, *J*=8.4, 2H), 1.30 (s, 9H). 13C NMR (75 MHz, DMSO-d6)  167.1, 164.3, 156.5, 128.6, 128.2, 125.4, 34.7, 30.6. Anal. Calcd for C12H15NO2: C, 70.24; H, 7.31; N, 6.82. Found: C, 70.16; H, 7.56; N, 6.64.

***N*-Formyl-4-cyanobenzimide**

Mp. 202-4 oC. IR (liquid film) 3221, 2227, 1742, 1687, 1485, 1380, 1270 cm-1. 1H NMR (400 MHz, DMSO-d6)  11.93 (d, *J*=7.2 1H), 9.26 (d, *J*=8.4, 1H), 8.15 (d, *J*=8.8, 2H), 8.04 (d, *J*=8.4, 2H). 13C NMR (75 MHz, DMSO-d6)  166.4, 164.2, 135.4, 132.5, 129.0, 117.9, 115.3. Anal. Calcd for C9H6N2O2: C, 62.07; H, 3.45; N, 16.09. Found: C, 61.85; H, 3.36; N, 15.92.

***N*-Formyl-3-nitrobenzimide**

Mp. 182-4 oC. IR (liquid film) 3225, 1746, 1682, 1527, 1495, 1279 cm-1. 1H NMR (400 MHz, DMSO-d6)  12.05 (s, 1H), 9.28 (s 1H), 8.8 (s, 1H), 8.51 (d, *J*=8.0, 2H), 8.43 (d, *J*=7.2, 1H). 7.86 (t, *J*=8.4, 1H). 13C NMR (75 MHz, DMSO-d6)  165.8, 164.3, 147.8, 134.6, 133.1, 130.4, 127.7, 123.2. Anal. Calcd for C8H6N2O4: C, 49.48; H, 3.09; N, 14.43. Found: C, 49.75; H, 3.12; N, 14.28.

***N*-Formyl-4-trifluorobenzimide**

Mp. 172-4 oC. IR (liquid film) 3262, 1737, 1691, 1527, 1462, 1330, 1257, 1183 cm-1. 1H NMR (400 MHz, DMSO-d6)  11.90 (s, 1H), 9.28 (s 1H), 8.21 (d, *J*=8.4, 2H), 7.93 (d, *J*=8.4, 2H). 13C NMR (75 MHz, DMSO-d6)  166.6, 164.4, 164.2, 135.3, 132.1, 129.4, 129.0, 125.6, 125.4, 121.8. Anal. Calcd for C9H6FNO2: C, 49.76; H, 2.76; N, 6.45. Found: C, 49.63; H, 2.67; N, 6.38.
